# Supplementary material for: Differentiation therapy of myeloid leukemia: four decades of development
Source: PubMed Central journal article supplement — Haematologica. 2020 Oct 9;106(1):26–38. doi: 10.3324/haematol.2020.262121 (PMC7776344; doi:10.3324/haematol.2020.262121), 2020-10-09
Supplement: 2020_262121-Disclosures_Contributions.pdf [file 2020_262121-Disclosures_Contributions.pdf]

Haematologica  
HAEMATOL/2020/262121  
Version 3

Differentiation therapy of myeloid leukemia: 4 decades of development

Vikas Madan and H. Phillip Koeffler

Disclosures: The authors declare no competing financial interests

Contributions: V.M. performed literature search and wrote the review, H.P.K. conceived and wrote the manuscript.
